# Supplementary material for: Expression of intramuscular extracellular matrix proteins in vastus lateralis muscle fibres between atrophic and non-atrophic COPD
Source: PubMed Central journal article supplement (PMC11129643; doi:10.1183/23120541.00857-2023), 2024-05-27
Supplement: 00857-2023.SUPPLEMENT.pdf [file 00857-2023.SUPPLEMENT.pdf]

## ONLINE SUPPLEMENT

### MATERIAL AND METHODS:

#### Primer sequences used in this study:

*COL1A1* sense, 5'-CACGACAAAGCAGAAACAT-3', antisense 5'-TTCAGCAACACAGTTACAC-3'; *COL1A2* sense, 5'-GGATGAGGAGACTGGCAAC-3', antisense 5'-GTGATGGCTTATTTGTTTTG-3'; *FN1* sense 5'-GAAAGACCAGCAGAGGCATA-3', antisense 5'-ACTCATCTCCAACGGCATAA-3'; *TNC* sense 5'-ACCCACTACACAGCCAAGA-3', antisense 5'-TCAGGAACACAATCCATCCA; *SPP1* sense 5'-CTACCTTCGCCTATGTTGTCA-3', antisense 5'-GTGATTAGTGATGTTGAGCA-3'; *SPARC* sense 5'-TGAGAGGGATGAGGACAACAA-3', antisense 5'-ATGAGGGGAGCACGCAGT-3'; *DCN*: sense 5'-TTGGAACGACTTTATCTGTCC-3', antisense 5'-TAAGGGAAGGAGGAAGACCT-3'; *BGN*: sense 5'-CCTGGGTCTGAAGTCTGT-3', antisense 5'-GTGGTTCTTGGAGATGTAGA-3'; *ITGB1*: sense 5'-CCTTTTTGACCTTTTCTTCCTG-3', antisense 5'-GACATTTACTTTGGATTCT-3'; *PAX7*: sense 5'-CAGTCAACAAGACATTCCTA-3', antisense 5'-TGAAGATGAGAAACAGGTA-3'; *MYOD1*: sense 5'-AGACCCTCGCAGACCTAA-3', antisense 5'-CTGGCAAAGCAACTCTTAT-3'; *Myostatin*: sense 5'-ACCATGCCTACAGAGTCTGA-3', antisense 5'-GATTCAGGTTGTTTGAGCCAA-3'. Real-time PCR was performed with SYBRGreen I (Molecular Probes) and Platinum Taq DNA polymerase (Invitrogen) in a StepOnePlus RT-PCR system (Applied Biosystems). Analysis was performed using the  $2^{-\Delta\Delta Ct}$  method [1]. All values were normalized against expression of the glyceraldehyde-3-phosphate dehydrogenase (*GAPDH*: sense 5'-GAAGGTGAAGGTCGGAGT-3', antisense 5'-CATGGGTGGAATCATATTGGAA-3') [2].

#### Protein analyses using ELISA.

Proteins were analysed using ELISA, which sensitivity and detection range are described for the following kits: collagen I (ab285250, Abcam, 0.188 ng/ml, 0.31 – 20 ng/ml); collagen IV (orb562147, 0.188 ng/ml, 0.31 – 20 ng/ml) and integrin beta 1 (orb563558, 9.375 pg/ml, 15.6 – 1000 pg/ml) from Biorbyt; osteopontin (DOST00, 0.024 ng/ml, 0.3 – 20 ng/ml), fibronectin (DFBN10, 0.579 ng/ml, 3.1 – 200 ng/ml), SPARC (DSP00, 0.269 ng/ml, 1.6 – 50 ng/ml) from R&D Systems; tenascin C (EH446RB, 6.1 pg/ml, 6.1 – 1500 pg/ml), decorin (EHDCN, 1.50 pg/ml, 0.96 – 700 pg/ml), and biglycan (EH45RB, 0.51 ng/ml, 0.51 – 125 ng/ml) from Thermo Fisher Scientific. Acquired standard curves for individual ELISA kits are shown in Supplementary Figure 3.

**Supplementary Table 1. Demographic characteristics of healthy individuals and COPD patients**

| <b>Characteristics</b>                 | <b>COPD</b>               | <b>Healthy</b> |
|----------------------------------------|---------------------------|----------------|
| <b>Individuals (n)</b>                 | 29                        | 14             |
| <b>Age (years)</b>                     | 65.68 ± 1.42 <sup>*</sup> | 21.80 ± 0.60   |
| <b>Weight (kg)</b>                     | 72.89 ± 2.62              | 74.20 ± 2.10   |
| <b>BMI (kg • m<sup>-2</sup>)</b>       | 25.94 ± 0.80              | 23.45 ± 0.58   |
| <b>FFM index (kg • m<sup>-2</sup>)</b> | 17.76 ± 0.40              | 23.70 ± 0.67   |
| <b>FEV<sub>1</sub> (L)</b>             | 1.13 ± 0.08               | -              |
| <b>FEV<sub>1</sub> (% predicted)</b>   | 43.32 ± 3.29              | -              |
| <b>FVC (L)</b>                         | 2.73 ± 0.14               | -              |
| <b>FVC (% predicted)</b>               | 78.80 ± 3.91              | -              |

Data are presented as mean ± SEM. BMI: body mass index; FFM: fat-free mass; FEV<sub>1</sub>: forced expiratory volume in the first second; FVC: forced vital capacity; Asterisks indicate  $p < 0.05$  significance level between COPD and healthy groups.

**Supplementary Table 2. Muscle fibre morphological characteristics of healthy individuals and COPD patients.**

| Muscle fibre characteristics                      | COPD          | Healthy      |
|---------------------------------------------------|---------------|--------------|
| Individuals (n)                                   | 29            | 14           |
| <b>Fibre type distribution (%)</b>                |               |              |
| Type I                                            | 33.0 ± 2.9    | 39.8 ± 4.6   |
| Type II                                           | 65.9 ± 2.4    | 59.2 ± 5.9   |
| Type IIa                                          | 52.0 ± 1.9*   | 38.9 ± 2.8   |
| Type IIx                                          | 15.5 ± 0.7    | 20.2 ± 3.1   |
| <b>Cross sectional area (CSA, μm<sup>2</sup>)</b> |               |              |
| Mean CSA                                          | 4100 ± 106.9* | 4582 ± 155.6 |
| Type I                                            | 4763 ± 171.9* | 3974 ± 146.8 |
| Type IIa                                          | 4154 ± 138.7* | 5656 ± 205.8 |
| Type IIx                                          | 3339 ± 165.2* | 4176 ± 180.2 |
| Capillary/fibre ratio                             | 1.43 ± 0.07*  | 2.02 ± 0.56  |

Data are presented as mean ± SEM. Asterisks indicate  $p < 0.05$  significance

level between COPD and healthy control group.

**Supplementary Table 3. Protein expression of ECM molecules in vastus lateralis muscle of COPD patients and healthy controls.**

| <b>Protein (pg/ml)</b> | <b>COPD</b>              | <b>Healthy</b>         | <b>p-value</b>    |
|------------------------|--------------------------|------------------------|-------------------|
| <b>COL1</b>            | 380.5* (256.0-457.4)     | 6441 (1423-11580)      | <b>&lt;0.0001</b> |
| <b>COL4</b>            | 372.3 (281.1-530.8)      | 416.9 (309.0-624.7)    | 0.3621            |
| <b>Fibronectin</b>     | 9418.0* (6271.0-13150.0) | 3918.0 (2867.0-5972.0) | <b>0.0002</b>     |
| <b>ITGβ1</b>           | 55.9 (40.8-96.9)         | 61.6 (49.9-73.5)       | 0.4852            |
| <b>Osteopontin</b>     | 70.34* (30.60-146.9)     | 26.78 (20.65-66.8)     | <b>0.0194</b>     |
| <b>Tenascin C</b>      | 10.4* (5.1-14.2)         | 16.8 (6.1-22.0)        | <b>0.0403</b>     |
| <b>SPARC</b>           | 1612.0* (1186.0-1880.0)  | 1224.0 (940.5-1342.0)  | <b>0.0095</b>     |
| <b>Decorin</b>         | 42.8* (38.68-48.1)       | 71.1 (57.4-85.9)       | <b>&lt;0.0001</b> |
| <b>Biglycan</b>        | 230.8 (137.2-376.6)      | 169.9 (111.2-250.3)    | 0.1430            |

Protein expression was measured with ELISA. Data are shown as median (25 – 75 % percentile). Asterisks indicate  $p < 0.05$  significance level between COPD and healthy control group.
